# Supplementary material for: Impact of newly constructed primary healthcare centres on antenatal care attendance, facility delivery and all-cause mortality: quasi-experimental evidence from Taabo health and demographic surveillance system, Côte d’Ivoire
Source: HighWire-hosted journal article supplement (doi:10.1136/bmjopen-2021-054355), 2022-01-01
Supplement: bmjopen-2021-054355supp001_data_supplement.pdf [file bmjopen-2021-054355supp001_data_supplement.pdf]

## Appendix

**Table 1: Characteristics of pregnant women**

|                       | Sample of pregnant women |       |
|-----------------------|--------------------------|-------|
|                       | N                        | (%)   |
| ANC attendance        |                          |       |
| At least one ANC      | 10162                    | 71.9  |
| No ANC                | 3970                     | 28.1  |
| Place of delivery     |                          |       |
| Health facility       | 7396                     | 52.3  |
| Home                  | 6681                     | 47.3  |
| Other                 | 55                       | 0.4   |
| Mother marital status |                          |       |
| Single                | 1226                     | 8.7   |
| Common-law union      | 5406                     | 38.2  |
| Married               | 7403                     | 52.4  |
| divorced/widowed      | 97                       | 0.7   |
| Mother religion       |                          |       |
| Christian             | 8276                     | 58.6  |
| Muslim                | 4483                     | 31.7  |
| Other                 | 1373                     | 9.7   |
| Socioeconomic status  |                          |       |
| Most poor             | 2844                     | 20.1  |
| Poor                  | 2825                     | 20.0  |
| Middle                | 2818                     | 19.9  |
| Rich                  | 2826                     | 20.0  |
| Most rich             | 2819                     | 20.0  |
| Mother school level   |                          |       |
| Never attended        | 7853                     | 55.6  |
| Primaty               | 4238                     | 30.0  |
| Secondary/higher      | 1246                     | 8.8   |
| Coranic               | 795                      | 5.6   |
| Maternal age          |                          |       |
| 15-19                 | 2197                     | 15.5  |
| 20-34                 | 9708                     | 68.7  |
| ≥35                   | 2227                     | 15.8  |
| Total                 | 14132                    | 100.0 |
